# Supplementary material for: Ischemic stroke-related gene expression profiles across species: a meta-analysis
Source: J Inflamm (Lond). 2023 Jun 19;20:21. doi: 10.1186/s12950-023-00346-x (PMC10280959; doi:10.1186/s12950-023-00346-x)
Supplement: Supplementary file 1 — Supplementary Material 1 [file 12950_2023_346_MOESM1_ESM.xlsx]

## Sheet: Sheet0
Suppl. Table 1: Overview of all analyzed studies from GEO database
ID	Species	Sex	age	ExactTime	Time points	Stroke model	Reperfusion, min	Control
GSE103661	Rattus norvegicus	male	adult	3h	acute	pMCAO	permanent	sham operated
GSE33725	Rattus norvegicus	male	adult	6h	acute	pMCAO	permanent	sham operated
GSE33725	Rattus norvegicus	male	adult	2h	acute	pMCAO	permanent	sham operated
GSE163654	Rattus Norvegicus	unknown	adult	2h	acute	pMCAO	permanent	sham operated
GSE163654	Rattus Norvegicus	unknown	adult	6h	acute	pMCAO	permanent	sham operated
GSE60820	mus musculus	male	adult	6h	acute	pMCAO	permanent	contralesional site
GSE23160	mus musculus	male	adult	8h	acute	tMCAO	120	sham operated
GSE32529	mus musculus	male	adult	3h	acute	tMCAO	45	sham operated
GSE28731	mus musculus	male	adult	24h	acute	tMCAO	60	sham operated
GSE163654	mus musculus	unknown	adult	2h	acute	pMCAO	permanent	sham operated
GSE163654	mus musculus	unknown	adult	6h	acute	pMCAO	permanent	sham operated
GSE137595	mus musculus	male	adult	2h	acute	tMCAO	90	sham operated
GSE35589	macaca mulatta	male	adult	1h	acute	tMCAO	90	contralesional site
GSE35589	macaca mulatta	male	adult	6h	acute	tMCAO	90	contralesional site
GSE107452	macaca mulatta	male	adult	6h	acute	tMCAO	unknown	contralesional site
GSE36010	Rattus norvegicus	unknown	adult	3d	long-term	pMCAO	permanent	sham operated
GSE52001	Rattus Norvegicus	male	adult	different	long-term	tMCAO	60	unknown
GSE61616	Rattus Norvegicus	male	adult	7d	long-term	tMCAO	unknown	unknown
GSE55260	Rattus Norvegicus	male	adult	14d	long-term	tMCAO	90	intact
GSE196448	mus musculus	unknown	adult	7d	long-term	tMCAO	7	sham operated
GSE208605	mus musculus	mixed	adult	21d	long-term	photothrombotic stroke	permanent	sham operated
GSE9391	homo sapiens	mixed	adult	different	long-term	natural	NA	intact
GSE162955	homo sapiens	mixed	adult	different	long-term	natural	NA	contralesional site
GSE97537	Rattus norvegicus	male	adult	24h	subacute	pMCAO	permanent	sham operated
GSE36010	Rattus norvegicus	unknown	adult	24h	subacute	pMCAO	permanent	sham operated
GSE38037	Rattus Norvegicus	male	adult	24h	subacute	tMCAO	unknown	sham operated
GSE78731	Rattus Norvegicus	male	adult	72h	subacute	tMCAO	unknown	intact
GSE55260	Rattus Norvegicus	male	adult	3d	subacute	tMCAO	90	intact
GSE166162	Rattus Norvegicus	male	adult	3d	subacute	tMCAO	60	sham operated
GSE23160	mus musculus	male	adult	24h	subacute	tMCAO	120	sham operated
GSE32529	mus musculus	male	adult	24h	subacute	tMCAO	45	sham operated
GSE30655	mus musculus	male	adult	24h	subacute	tMCAO	60	intact
GSE58720	mus musculus	male	adult	24h	subacute	tMCAO	90	unknown
GSE120565	mus musculus	mixed	adult	48h	subacute	tMCAO	60	contralesional site

## Sheet: Sheet1
Suppl. Table 2: Median fold changes of most differentially expressed genes acutely after stroke in mice and rats
Species	Gene.symbol	logFC	Regulation
Mouse	or5m9	-0.819437	Downregulated
Mouse	or4e5	-0.803961	Downregulated
Mouse	or1r1	-0.639548	Downregulated
Mouse	or10j27	-0.634558	Downregulated
Mouse	or5w19	-0.633792	Downregulated
Mouse	sostdc1	-0.633737	Downregulated
Mouse	or8k22	-0.598463	Downregulated
Mouse	or9k2	-0.596986	Downregulated
Mouse	or6aa1	-0.595239	Downregulated
Mouse	or52n3	-0.589649	Downregulated
Mouse	or1j13	-0.586391	Downregulated
Mouse	or52s1	-0.584994	Downregulated
Mouse	or2b2	-0.574185	Downregulated
Mouse	amy2a3	-0.572381	Downregulated
Mouse	or51q1	-0.547148	Downregulated
Mouse	or4b1	-0.538302	Downregulated
Mouse	or6d15	-0.534399	Downregulated
Mouse	or52ab2	-0.524342	Downregulated
Mouse	or10d3	-0.512509	Downregulated
Mouse	or52h1	-0.505126	Downregulated
Mouse	or2n1e	-0.504454	Downregulated
Mouse	drd2	-0.496306	Downregulated
Mouse	or10d4b	-0.495224	Downregulated
Mouse	or5p4	-0.49445	Downregulated
Mouse	or5w18	-0.490622	Downregulated
Mouse	or7g21	-0.489712	Downregulated
Mouse	or2y15	-0.4883	Downregulated
Mouse	kcnj13	-0.487332	Downregulated
Mouse	or14a257	-0.48316	Downregulated
Mouse	or4p22	-0.482062	Downregulated
Rat	lbp	-2.00361	Downregulated
Rat	fgf10	-1.66148	Downregulated
Rat	mpl	-1.66103	Downregulated
Rat	svs5	-1.63815	Downregulated
Rat	rhox12	-1.5933	Downregulated
Rat	glra3	-1.58486	Downregulated
Rat	lhx1	-1.57932	Downregulated
Rat	slc26a2	-1.56773	Downregulated
Rat	irs1	-1.56648	Downregulated
Rat	fpgs	-1.55036	Downregulated
Rat	ubr1	-1.54927	Downregulated
Rat	kcnj2	-1.52967	Downregulated
Rat	ntn1	-1.50045	Downregulated
Rat	rhox13	-1.50043	Downregulated
Rat	krt24	-1.48184	Downregulated
Rat	btla	-1.47559	Downregulated
Rat	tmc5	-1.46989	Downregulated
Rat	acsm4	-1.46453	Downregulated
Rat	il5	-1.46011	Downregulated
Rat	cxcl9	-1.45771	Downregulated
Rat	gstt4	-1.43988	Downregulated
Rat	crybb2	-1.42453	Downregulated
Rat	or1e16	-1.42079	Downregulated
Rat	gpx5	-1.42003	Downregulated
Rat	tns4	-1.41246	Downregulated
Rat	slc26a5	-1.40766	Downregulated
Rat	atp2c2	-1.40579	Downregulated
Rat	adgrf3	-1.40459	Downregulated
Rat	npffr2	-1.40189	Downregulated
Rat	ubxn10	-1.39885	Downregulated
Mouse	hspa1a	3.23	Upregulated
Mouse	ccl3	2.57019	Upregulated
Mouse	fosb	2.18223	Upregulated
Mouse	npas4	2	Upregulated
Mouse	cxcl1	1.93932	Upregulated
Mouse	cd14	1.83	Upregulated
Mouse	fos	1.8	Upregulated
Mouse	atf3	1.69217	Upregulated
Mouse	ccn1	1.605	Upregulated
Mouse	ptgs2	1.45069	Upregulated
Mouse	hmox1	1.37	Upregulated
Mouse	gadd45g	1.36956	Upregulated
Mouse	gadd45b	1.3656	Upregulated
Mouse	zfp36	1.35376	Upregulated
Mouse	jun	1.33962	Upregulated
Mouse	apold1	1.27103	Upregulated
Mouse	socs3	1.2665	Upregulated
Mouse	gpr84	1.244	Upregulated
Mouse	cdkn1a	1.2393	Upregulated
Mouse	ccl12	1.20469	Upregulated
Mouse	ccl2	1.19933	Upregulated
Mouse	hspb1	1.10979	Upregulated
Mouse	adamts1	1.1	Upregulated
Mouse	slc15a3	0.97717	Upregulated
Mouse	nptx2	0.97553	Upregulated
Mouse	osmr	0.96819	Upregulated
Mouse	ccl9	0.96085	Upregulated
Mouse	ctla2a	0.92368	Upregulated
Mouse	cxcl10	0.90992	Upregulated
Mouse	baz1a	0.90483	Upregulated
Rat	cxcl2	5.79947	Upregulated
Rat	hspa1a	5.56245	Upregulated
Rat	cxcl1	5.28367	Upregulated
Rat	ccl3	4.13	Upregulated
Rat	npas4	3.91	Upregulated
Rat	fosl1	3.12707	Upregulated
Rat	fos	3.05638	Upregulated
Rat	gdf15	3.05428	Upregulated
Rat	ccl2	2.64	Upregulated
Rat	tfpi2	2.51766	Upregulated
Rat	ccn1	2.38719	Upregulated
Rat	olr1	2.38	Upregulated
Rat	arc	2.11093	Upregulated
Rat	ptges	2.06713	Upregulated
Rat	gadd45g	2.06554	Upregulated
Rat	ccl4	2.02087	Upregulated
Rat	sele	1.96454	Upregulated
Rat	btg2	1.88634	Upregulated
Rat	atf3	1.8	Upregulated
Rat	cxcl10	1.73596	Upregulated
Rat	zfp36	1.72	Upregulated
Rat	fosb	1.66462	Upregulated
Rat	spp1	1.64059	Upregulated
Rat	dusp5	1.62718	Upregulated
Rat	apold1	1.61835	Upregulated
Rat	serpina3n	1.60606	Upregulated
Rat	cebpd	1.54399	Upregulated
Rat	nr4a1	1.52	Upregulated
Rat	timp1	1.49433	Upregulated
Rat	egr2	1.47085	Upregulated

## Sheet: Sheet2
Suppl. Table 3: Median fold changes of most differentially expressed genes subacutely after stroke in mice and rats
Species	Gene.symbol	logFC	Regulation
Mouse	or5p81	-2.7	Downregulated
Mouse	or51e1	-2.47	Downregulated
Mouse	iho1	-2.45	Downregulated
Mouse	or51r1	-2.43	Downregulated
Mouse	lbhd2	-2.32	Downregulated
Mouse	ccn3	-2.25	Downregulated
Mouse	gpr88	-2.17	Downregulated
Mouse	ripor2	-1.99	Downregulated
Mouse	vxn	-1.88	Downregulated
Mouse	pnma8b	-1.77	Downregulated
Mouse	septin5	-1.75	Downregulated
Mouse	ankrd63	-1.69848	Downregulated
Mouse	samd13	-1.69	Downregulated
Mouse	prr33	-1.68805	Downregulated
Mouse	armh4	-1.66	Downregulated
Mouse	or6b6	-1.65	Downregulated
Mouse	lrrc10b	-1.60125	Downregulated
Mouse	penk	-1.60014	Downregulated
Mouse	or51f2	-1.6	Downregulated
Mouse	pmch	-1.58432	Downregulated
Mouse	minar2	-1.55	Downregulated
Mouse	pnma8a	-1.51	Downregulated
Mouse	carmil3	-1.5	Downregulated
Mouse	tmem35a	-1.5	Downregulated
Mouse	myorg	-1.48	Downregulated
Mouse	gpr101	-1.47339	Downregulated
Mouse	il36rn	-1.44	Downregulated
Mouse	agt	-1.4	Downregulated
Mouse	magee2	-1.3931	Downregulated
Mouse	cfap20dc	-1.38	Downregulated
Rat	llcfc1	-1.54338	Downregulated
Rat	or4c29	-1.44457	Downregulated
Rat	spem2	-1.42985	Downregulated
Rat	or10s1	-1.42764	Downregulated
Rat	or4c1	-1.32959	Downregulated
Rat	plscr5	-1.32167	Downregulated
Rat	drd2	-1.29175	Downregulated
Rat	syndig1l	-1.22367	Downregulated
Rat	ccdc169	-1.1643	Downregulated
Rat	serpinb13	-1.1491	Downregulated
Rat	slc35d3	-1.14184	Downregulated
Rat	or9m1b	-1.10077	Downregulated
Rat	gpr88	-1.08	Downregulated
Rat	ccn3	-1.05793	Downregulated
Rat	tmem269	-1.0541	Downregulated
Rat	or2m12	-1.02121	Downregulated
Rat	or2y16	-1.01909	Downregulated
Rat	tas2r104	-1.01258	Downregulated
Rat	atp13a4	-1.00878	Downregulated
Rat	fezf1	-0.98549	Downregulated
Rat	or5w13	-0.984987	Downregulated
Rat	or4c110	-0.979133	Downregulated
Rat	or8s8	-0.97569	Downregulated
Rat	tmem151b	-0.970617	Downregulated
Rat	myorg	-0.968009	Downregulated
Rat	lamp5	-0.967186	Downregulated
Rat	septin5	-0.952285	Downregulated
Rat	kics2	-0.948113	Downregulated
Rat	drd1	-0.943372	Downregulated
Rat	slc15a5	-0.940421	Downregulated
Mouse	il36g	5.25	Upregulated
Mouse	lcn2	4.67	Upregulated
Mouse	spp1	4.34252	Upregulated
Mouse	hspa1a	3.40933	Upregulated
Mouse	lgals3	3.37851	Upregulated
Mouse	or5m13b	3.29	Upregulated
Mouse	timp1	3.26356	Upregulated
Mouse	hmox1	3.25	Upregulated
Mouse	ccl3	3.06095	Upregulated
Mouse	ccl12	3.05225	Upregulated
Mouse	atf3	2.96352	Upregulated
Mouse	gsta5	2.945	Upregulated
Mouse	mmp3	2.93996	Upregulated
Mouse	garin4	2.89	Upregulated
Mouse	il6	2.79909	Upregulated
Mouse	ccn1	2.75	Upregulated
Mouse	ccl4	2.7288	Upregulated
Mouse	cep295nl	2.58	Upregulated
Mouse	il11	2.55229	Upregulated
Mouse	s100a11	2.54592	Upregulated
Mouse	or9q1	2.54	Upregulated
Mouse	s100a8	2.50474	Upregulated
Mouse	tgm1	2.49	Upregulated
Mouse	s100a9	2.40648	Upregulated
Mouse	tgfbi	2.38389	Upregulated
Mouse	ccl9	2.37	Upregulated
Mouse	vim	2.36415	Upregulated
Mouse	socs3	2.3613	Upregulated
Mouse	cd14	2.35361	Upregulated
Mouse	arpc1b	2.33659	Upregulated
Rat	ccl2	4.71	Upregulated
Rat	msr1	3.93519	Upregulated
Rat	spp1	3.83	Upregulated
Rat	lgals3	3.69	Upregulated
Rat	cd300c2	3.585	Upregulated
Rat	timp1	3.48437	Upregulated
Rat	hspb1	3.38578	Upregulated
Rat	rrm2	3.35	Upregulated
Rat	gpnmb	3.18335	Upregulated
Rat	clec7a	2.915	Upregulated
Rat	pbk	2.77482	Upregulated
Rat	lcn2	2.76283	Upregulated
Rat	hspa1a	2.67	Upregulated
Rat	cd14	2.63671	Upregulated
Rat	ndc80	2.52468	Upregulated
Rat	pimreg	2.50052	Upregulated
Rat	ckap2	2.49427	Upregulated
Rat	gpr183	2.41226	Upregulated
Rat	hmox1	2.39495	Upregulated
Rat	ccl7	2.38	Upregulated
Rat	serpina3n	2.375	Upregulated
Rat	slamf9	2.36	Upregulated
Rat	siglec1	2.35	Upregulated
Rat	plp2	2.34472	Upregulated
Rat	cdk1	2.34	Upregulated
Rat	prc1	2.32972	Upregulated
Rat	serpine1	2.3275	Upregulated
Rat	hk3	2.31937	Upregulated
Rat	glipr2	2.27281	Upregulated
Rat	crisp3	2.25925	Upregulated

## Sheet: Sheet3
Suppl. Table 4: Median fold changes of most differentially expressed genes longterm after stroke in mice and rats
Species	Gene.symbol	logFC	Regulation
Mouse	ttr	-4.6044	Downregulated
Mouse	slc4a5	-3.07495	Downregulated
Mouse	tmem72	-3.05766	Downregulated
Mouse	f5	-2.85722	Downregulated
Mouse	shox2	-2.74212	Downregulated
Mouse	kcne2	-2.56336	Downregulated
Mouse	tph2	-2.36925	Downregulated
Mouse	otx2	-2.21971	Downregulated
Mouse	cldn2	-1.92066	Downregulated
Mouse	prlr	-1.83276	Downregulated
Mouse	slc18a2	-1.68131	Downregulated
Mouse	folr1	-1.67618	Downregulated
Mouse	glra1	-1.67193	Downregulated
Mouse	clic6	-1.63971	Downregulated
Mouse	sostdc1	-1.59548	Downregulated
Mouse	kl	-1.5049	Downregulated
Mouse	heatr5b	-1.39791	Downregulated
Mouse	hic2	-1.32883	Downregulated
Mouse	kdr	-1.30564	Downregulated
Mouse	egr2	-1.29807	Downregulated
Mouse	colq	-1.29702	Downregulated
Mouse	chrnb3	-1.28302	Downregulated
Mouse	kcnj13	-1.26724	Downregulated
Mouse	cyyr1	-1.22559	Downregulated
Mouse	ebf3	-1.19775	Downregulated
Mouse	npas4	-1.18457	Downregulated
Mouse	slc6a5	-1.18054	Downregulated
Mouse	irx3	-1.15653	Downregulated
Mouse	fos	-1.13981	Downregulated
Mouse	dgkk	-1.13249	Downregulated
Rat	msr1	-5.18944	Downregulated
Rat	cd300c2	-5.14499	Downregulated
Rat	stra6l	-4.00205	Downregulated
Rat	ckap2l	-3.53276	Downregulated
Rat	pclaf	-3.52215	Downregulated
Rat	aoah	-3.1436	Downregulated
Rat	rexo5	-3.0522	Downregulated
Rat	ticam2	-2.70345	Downregulated
Rat	cd84	-2.52246	Downregulated
Rat	pimreg	-2.48664	Downregulated
Rat	nlrp3	-2.43535	Downregulated
Rat	lrmda	-2.39649	Downregulated
Rat	ugt1a2	-2.33926	Downregulated
Rat	tmem273	-2.22401	Downregulated
Rat	tent5c	-2.10232	Downregulated
Rat	mastl	-2.07447	Downregulated
Rat	ckap2	-2.01047	Downregulated
Rat	exph5	-2.00942	Downregulated
Rat	dbf4	-1.97092	Downregulated
Rat	chrna3	-1.94506	Downregulated
Rat	lamp5	-1.9345	Downregulated
Rat	ap3b2	-1.89332	Downregulated
Rat	arc	-1.86416	Downregulated
Rat	pheta2	-1.83571	Downregulated
Rat	pla2g4e	-1.74834	Downregulated
Rat	dock3	-1.69326	Downregulated
Rat	car10	-1.67326	Downregulated
Rat	tcim	-1.66902	Downregulated
Rat	fam19a1	-1.62812	Downregulated
Rat	tph1	-1.6	Downregulated
Mouse	lcn2	5.86277	Upregulated
Mouse	mmp12	4.94706	Upregulated
Mouse	mmp13	4.71202	Upregulated
Mouse	clec7a	4.6029	Upregulated
Mouse	lyz2	4.50419	Upregulated
Mouse	gpnmb	4.21028	Upregulated
Mouse	lgals3	4.0741	Upregulated
Mouse	atp6v0d2	4.05053	Upregulated
Mouse	itgax	3.90269	Upregulated
Mouse	cd5l	3.79819	Upregulated
Mouse	cst7	3.6978	Upregulated
Mouse	ms4a15	3.63077	Upregulated
Mouse	steap4	3.61647	Upregulated
Mouse	tgm1	3.57605	Upregulated
Mouse	spp1	3.32137	Upregulated
Mouse	cd74	3.2289	Upregulated
Mouse	mmp3	3.15049	Upregulated
Mouse	a2m	3.14265	Upregulated
Mouse	apoc1	3.09946	Upregulated
Mouse	kcnj15	3.03341	Upregulated
Mouse	eomes	2.8596	Upregulated
Mouse	lum	2.82412	Upregulated
Mouse	cybb	2.81514	Upregulated
Mouse	col1a1	2.76947	Upregulated
Mouse	c3	2.72523	Upregulated
Mouse	cd22	2.69395	Upregulated
Mouse	vipr2	2.62996	Upregulated
Mouse	tbx21	2.61219	Upregulated
Mouse	timp1	2.5424	Upregulated
Mouse	cdhr1	2.49341	Upregulated
Rat	clec7a	5.44062	Upregulated
Rat	tlr8	4.6066	Upregulated
Rat	itgax	4.59114	Upregulated
Rat	evi2b	4.55916	Upregulated
Rat	fam46c	4.40754	Upregulated
Rat	cenpe	4.33966	Upregulated
Rat	mki67	4.27138	Upregulated
Rat	wdfy4	4.12	Upregulated
Rat	ddx60	3.75954	Upregulated
Rat	ccl6	3.72159	Upregulated
Rat	igkc	3.6946	Upregulated
Rat	spp1	3.67	Upregulated
Rat	gpnmb	3.62183	Upregulated
Rat	itih2	3.60034	Upregulated
Rat	card14	3.52862	Upregulated
Rat	lum	3.49	Upregulated
Rat	irf8	3.48909	Upregulated
Rat	frrs1	3.47068	Upregulated
Rat	clec4a3	3.45617	Upregulated
Rat	cd180	3.43595	Upregulated
Rat	cd33	3.419	Upregulated
Rat	mcub	3.12736	Upregulated
Rat	cnn2	3.07354	Upregulated
Rat	golm1	3.05617	Upregulated
Rat	shcbp1	3.04251	Upregulated
Rat	col4a6	3.00379	Upregulated
Rat	tmem173	2.93732	Upregulated
Rat	col8a2	2.93364	Upregulated
Rat	fam105a	2.92792	Upregulated
Rat	lgals3	2.91928	Upregulated

## Sheet: Sheet4
Suppl. Table 5: Median fold changes of 60 most differentially expressed genes acutely following tMCAo and pMCAo
Stroke.model	Gene.symbol	logFC	Regulation
pMCAO	or1e16	-1.41474	Downregulated
pMCAO	krt9	-1.22536	Downregulated
pMCAO	glra3	-1.18335	Downregulated
pMCAO	crnn	-1.17888	Downregulated
pMCAO	gpr33	-1.17636	Downregulated
pMCAO	fcrl6	-1.15648	Downregulated
pMCAO	cfap276	-1.15125	Downregulated
pMCAO	chrm5	-1.13395	Downregulated
pMCAO	ccdc88c	-1.12706	Downregulated
pMCAO	krt82	-1.10973	Downregulated
pMCAO	dnah9	-1.08695	Downregulated
pMCAO	or12d17	-1.08513	Downregulated
pMCAO	gnrhr	-1.08486	Downregulated
pMCAO	rhox12	-1.06973	Downregulated
pMCAO	obp2b	-1.06957	Downregulated
pMCAO	prop1	-1.05079	Downregulated
pMCAO	calm5	-1.04	Downregulated
pMCAO	a1cf	-0.988236	Downregulated
pMCAO	cyct	-0.968922	Downregulated
pMCAO	neurog1	-0.961225	Downregulated
pMCAO	sbk3	-0.957331	Downregulated
pMCAO	gm1979	-0.954	Downregulated
pMCAO	slc26a5	-0.946118	Downregulated
pMCAO	amy2a3	-0.94589	Downregulated
pMCAO	olah	-0.927742	Downregulated
pMCAO	lctl	-0.926399	Downregulated
pMCAO	atp1a4	-0.919963	Downregulated
pMCAO	smagp	-0.91101	Downregulated
pMCAO	efcab3	-0.910366	Downregulated
pMCAO	klra22	-0.908047	Downregulated
tMCAO	gm20852	-1.50132	Downregulated
tMCAO	gm20867	-1.49116	Downregulated
tMCAO	gm20865	-1.39704	Downregulated
tMCAO	or51q1c	-1.38731	Downregulated
tMCAO	or5w19	-1.32778	Downregulated
tMCAO	prl2c2	-1.26361	Downregulated
tMCAO	pramel50	-1.2405	Downregulated
tMCAO	gm16405	-1.20659	Downregulated
tMCAO	or6c6	-1.20591	Downregulated
tMCAO	gm20871	-1.17917	Downregulated
tMCAO	gm13275	-1.15068	Downregulated
tMCAO	gm20822	-1.14652	Downregulated
tMCAO	gm10488	-1.14359	Downregulated
tMCAO	gm20809	-1.13969	Downregulated
tMCAO	or6d15	-1.1291	Downregulated
tMCAO	or51q1	-1.113	Downregulated
tMCAO	vmn1r104	-1.1024	Downregulated
tMCAO	or14j2	-1.09779	Downregulated
tMCAO	sprr2a2	-1.09774	Downregulated
tMCAO	gm13287	-1.09411	Downregulated
tMCAO	or1j13	-1.07798	Downregulated
tMCAO	gm6367	-1.06506	Downregulated
tMCAO	gm10406	-1.05209	Downregulated
tMCAO	btbd35f12	-1.05011	Downregulated
tMCAO	vmn1r131	-1.04959	Downregulated
tMCAO	or5p80	-1.03912	Downregulated
tMCAO	slxl1	-1.02477	Downregulated
tMCAO	or9g19	-1.02319	Downregulated
tMCAO	gm13277	-1.02226	Downregulated
tMCAO	gm13290	-1.02226	Downregulated
pMCAO	cxcl1	5.16342	Upregulated
pMCAO	hspa1b	4.21	Upregulated
pMCAO	hspa1a	3.675	Upregulated
pMCAO	npas4	3.395	Upregulated
pMCAO	ccl3	3.175	Upregulated
pMCAO	fos	2.5656	Upregulated
pMCAO	ccl2	2.24701	Upregulated
pMCAO	fosb	1.96356	Upregulated
pMCAO	lilrb4a	1.935	Upregulated
pMCAO	gadd45g	1.77471	Upregulated
pMCAO	ccn1	1.64	Upregulated
pMCAO	cd14	1.59108	Upregulated
pMCAO	gadd45b	1.55827	Upregulated
pMCAO	ccl4	1.53103	Upregulated
pMCAO	inhba	1.52152	Upregulated
pMCAO	atf3	1.49202	Upregulated
pMCAO	apold1	1.48418	Upregulated
pMCAO	dusp5	1.41742	Upregulated
pMCAO	nptx2	1.34336	Upregulated
pMCAO	hspb1	1.29	Upregulated
pMCAO	jun	1.20909	Upregulated
pMCAO	timp1	1.17795	Upregulated
pMCAO	ptgs2	1.17529	Upregulated
pMCAO	il1a	1.16556	Upregulated
pMCAO	egr2	1.11837	Upregulated
pMCAO	gdf15	1.11835	Upregulated
pMCAO	junb	1.09138	Upregulated
pMCAO	btg2	1.07	Upregulated
pMCAO	nfil3	1.03956	Upregulated
pMCAO	arc	1.02	Upregulated
tMCAO	ccn1	3.2998	Upregulated
tMCAO	hspa1b	3.15162	Upregulated
tMCAO	ccl3	2.93092	Upregulated
tMCAO	hspa1a	2.60051	Upregulated
tMCAO	fos	2.15352	Upregulated
tMCAO	cd14	2.12598	Upregulated
tMCAO	ccl4	2.05179	Upregulated
tMCAO	lcn2	1.9626	Upregulated
tMCAO	atf3	1.95051	Upregulated
tMCAO	npas4	1.85169	Upregulated
tMCAO	cxcl1	1.79691	Upregulated
tMCAO	adamts1	1.75963	Upregulated
tMCAO	timp1	1.75324	Upregulated
tMCAO	hmox1	1.68282	Upregulated
tMCAO	hspb1	1.65899	Upregulated
tMCAO	ccl2	1.6467	Upregulated
tMCAO	socs3	1.64074	Upregulated
tMCAO	apold1	1.62406	Upregulated
tMCAO	zfp36	1.55668	Upregulated
tMCAO	ccl9	1.55476	Upregulated
tMCAO	cxcl10	1.41101	Upregulated
tMCAO	gadd45g	1.39167	Upregulated
tMCAO	ch25h	1.39044	Upregulated
tMCAO	ccl12	1.37854	Upregulated
tMCAO	gpr84	1.36506	Upregulated
tMCAO	ier2	1.34434	Upregulated
tMCAO	lgals3	1.31987	Upregulated
tMCAO	depp1	1.31042	Upregulated
tMCAO	fosb	1.31024	Upregulated
tMCAO	egr2	1.29178	Upregulated

## Sheet: Sheet5
Suppl. Table 6: Median fold changes of 60 most differentially expressed genes following tMCAo and pMCAo and photothrombotic stroke (PT) at the long-term period.
Stroke.model	Gene.symbol	logFC	Regulation
PT	ttr	-4.6044	Downregulated
PT	slc4a5	-3.07495	Downregulated
PT	tmem72	-3.05766	Downregulated
PT	f5	-2.85722	Downregulated
PT	shox2	-2.74212	Downregulated
PT	kcne2	-2.56336	Downregulated
PT	tph2	-2.36925	Downregulated
PT	otx2	-2.21971	Downregulated
PT	cldn2	-1.92066	Downregulated
PT	prlr	-1.83276	Downregulated
PT	slc18a2	-1.68131	Downregulated
PT	folr1	-1.67618	Downregulated
PT	glra1	-1.67193	Downregulated
PT	clic6	-1.63971	Downregulated
PT	sostdc1	-1.59548	Downregulated
PT	kl	-1.5049	Downregulated
PT	kdr	-1.30564	Downregulated
PT	egr2	-1.29807	Downregulated
PT	colq	-1.29702	Downregulated
PT	chrnb3	-1.28302	Downregulated
PT	kcnj13	-1.26724	Downregulated
PT	cyyr1	-1.22559	Downregulated
PT	ebf3	-1.19775	Downregulated
PT	npas4	-1.18457	Downregulated
PT	slc6a5	-1.18054	Downregulated
PT	irx3	-1.15653	Downregulated
PT	fos	-1.13981	Downregulated
PT	dgkk	-1.13249	Downregulated
PT	flt1	-1.1077	Downregulated
PT	dll4	-1.09989	Downregulated
pMCAO	spp1	-8.26411	Downregulated
pMCAO	mmp7	-6.2752	Downregulated
pMCAO	cd8a	-5.98213	Downregulated
pMCAO	ccl2	-5.9248	Downregulated
pMCAO	fabp4	-5.88733	Downregulated
pMCAO	ccl7	-5.86505	Downregulated
pMCAO	fcnb	-5.83029	Downregulated
pMCAO	lgals3	-5.70546	Downregulated
pMCAO	hk3	-5.49587	Downregulated
pMCAO	gpnmb	-5.47678	Downregulated
pMCAO	mmp12	-5.39491	Downregulated
pMCAO	slpi	-5.37663	Downregulated
pMCAO	plau	-5.34922	Downregulated
pMCAO	slamf9	-5.34372	Downregulated
pMCAO	lilrb4	-5.25645	Downregulated
pMCAO	knstrn	-5.24517	Downregulated
pMCAO	msr1	-5.18944	Downregulated
pMCAO	cd300c2	-5.14499	Downregulated
pMCAO	loc689770	-5.11622	Downregulated
pMCAO	cdk1	-5.06401	Downregulated
pMCAO	cenpa	-5.02167	Downregulated
pMCAO	lcn2	-4.9691	Downregulated
pMCAO	kif2c	-4.92912	Downregulated
pMCAO	cd68	-4.82401	Downregulated
pMCAO	c9h6orf141	-4.74221	Downregulated
pMCAO	igsf6	-4.67243	Downregulated
pMCAO	pbk	-4.67212	Downregulated
pMCAO	cdca2	-4.66408	Downregulated
pMCAO	prc1	-4.6304	Downregulated
pMCAO	il1rl1	-4.60038	Downregulated
tMCAO	arc	-3.01632	Downregulated
tMCAO	ccn1	-2.39332	Downregulated
tMCAO	exph5	-2.00942	Downregulated
tMCAO	nr4a1	-1.99068	Downregulated
tMCAO	lamp5	-1.96116	Downregulated
tMCAO	hbb-b1	-1.95282	Downregulated
tMCAO	chrna3	-1.94506	Downregulated
tMCAO	kcnv1	-1.83355	Downregulated
tMCAO	cort	-1.77455	Downregulated
tMCAO	pla2g4e	-1.74834	Downregulated
tMCAO	crh	-1.72959	Downregulated
tMCAO	hbb	-1.70418	Downregulated
tMCAO	egr2	-1.68452	Downregulated
tMCAO	lrriq1	-1.62936	Downregulated
tMCAO	egr4	-1.62226	Downregulated
tMCAO	chrm1	-1.6185	Downregulated
tMCAO	tph1	-1.6	Downregulated
tMCAO	sowahb	-1.56956	Downregulated
tMCAO	2005-09-01	-1.56708	Downregulated
tMCAO	vom2r40	-1.5605	Downregulated
tMCAO	cplx2	-1.46798	Downregulated
tMCAO	wnt10a	-1.45248	Downregulated
tMCAO	sptssb	-1.44989	Downregulated
tMCAO	tac1	-1.44	Downregulated
tMCAO	nefm	-1.42614	Downregulated
tMCAO	fam43b	-1.41272	Downregulated
tMCAO	egr1	-1.39335	Downregulated
tMCAO	hes2	-1.37405	Downregulated
tMCAO	hbb-bs	-1.36636	Downregulated
tMCAO	mslnl	-1.35796	Downregulated
PT	lcn2	5.86277	Upregulated
PT	c3	5.52345	Upregulated
PT	mmp12	4.94706	Upregulated
PT	mmp13	4.71202	Upregulated
PT	clec7a	4.6029	Upregulated
PT	lyz2	4.50419	Upregulated
PT	gpnmb	4.21028	Upregulated
PT	lgals3	4.0741	Upregulated
PT	atp6v0d2	4.05053	Upregulated
PT	itgax	3.90269	Upregulated
PT	cd5l	3.79819	Upregulated
PT	cst7	3.6978	Upregulated
PT	ms4a15	3.63077	Upregulated
PT	steap4	3.61647	Upregulated
PT	col3a1	3.59967	Upregulated
PT	tgm1	3.57605	Upregulated
PT	spp1	3.32137	Upregulated
PT	cd74	3.2289	Upregulated
PT	mmp3	3.15049	Upregulated
PT	a2m	3.14265	Upregulated
PT	apoc1	3.09946	Upregulated
PT	kcnj15	3.03341	Upregulated
PT	eomes	2.8596	Upregulated
PT	lum	2.82412	Upregulated
PT	cybb	2.81514	Upregulated
PT	col1a1	2.76947	Upregulated
PT	cd22	2.69395	Upregulated
PT	vipr2	2.62996	Upregulated
PT	tbx21	2.61219	Upregulated
PT	timp1	2.5424	Upregulated
pMCAO	arc	-2.4609	Downregulated
pMCAO	tnnc2	-2.40596	Downregulated
pMCAO	slc12a1	-2.35463	Downregulated
pMCAO	nr4a1	-2.21391	Downregulated
pMCAO	tob1	-2.17245	Downregulated
pMCAO	selenov	-2.08931	Downregulated
pMCAO	ckmt2	-2.03497	Downregulated
pMCAO	arr3	-2.03236	Downregulated
pMCAO	egr4	-1.9534	Downregulated
pMCAO	lamp5	-1.89364	Downregulated
pMCAO	nr4a3	-1.88436	Downregulated
pMCAO	cftr	-1.80832	Downregulated
pMCAO	pcdh20	-1.74008	Downregulated
pMCAO	dusp1	-1.72264	Downregulated
pMCAO	alb	-1.71949	Downregulated
pMCAO	nphp4	-1.67489	Downregulated
pMCAO	cbln4	-1.66329	Downregulated
pMCAO	cbln2	-1.64809	Downregulated
pMCAO	slc17a6	-1.64578	Downregulated
pMCAO	or10g9b	-1.62866	Downregulated
pMCAO	egr2	-1.61769	Downregulated
pMCAO	rnd1	-1.61187	Downregulated
pMCAO	cartpt	-1.60549	Downregulated
pMCAO	vsnl1	-1.59117	Downregulated
pMCAO	crh	-1.57901	Downregulated
pMCAO	khdrbs2	-1.57816	Downregulated
pMCAO	qrfpr	-1.57744	Downregulated
pMCAO	mrgprd	-1.56501	Downregulated
pMCAO	kcnj3	-1.55445	Downregulated
pMCAO	pnlip	-1.55204	Downregulated
tMCAO	spp1	-6.70702	Downregulated
tMCAO	clec7a	-5.44062	Downregulated
tMCAO	lilrb4	-5.01709	Downregulated
tMCAO	tlr8	-4.6066	Downregulated
tMCAO	itgax	-4.59114	Downregulated
tMCAO	evi2b	-4.55916	Downregulated
tMCAO	mmp12	-4.423	Downregulated
tMCAO	cenpe	-4.33966	Downregulated
tMCAO	mki67	-4.27138	Downregulated
tMCAO	lum	-4.2251	Downregulated
tMCAO	cd68	-4.14	Downregulated
tMCAO	wdfy4	-4.12	Downregulated
tMCAO	gpnmb	-3.99	Downregulated
tMCAO	fcrl2	-3.7672	Downregulated
tMCAO	ccl6	-3.72159	Downregulated
tMCAO	igkc	-3.6946	Downregulated
tMCAO	ifitm1	-3.69	Downregulated
tMCAO	itih2	-3.60034	Downregulated
tMCAO	fabp4	-3.56505	Downregulated
tMCAO	arl11	-3.56278	Downregulated
tMCAO	card14	-3.52862	Downregulated
tMCAO	irf8	-3.48909	Downregulated
tMCAO	frrs1	-3.47068	Downregulated
tMCAO	clec4a3	-3.45617	Downregulated
tMCAO	cd180	-3.43595	Downregulated
tMCAO	lgals3	-3.42	Downregulated
tMCAO	cd33	-3.419	Downregulated
tMCAO	blnk	-3.30336	Downregulated
tMCAO	bcl2a1	-3.24935	Downregulated
tMCAO	plau	-3.22862	Downregulated

## Sheet: Sheet6
Suppl. Table 7: Median fold changes of 60 most differentially expressed genes at different time periods after stroke.
Time.points	Gene.symbol	logFC	Regulation
acute	mir374b	-2.15	Downregulated
acute	mir421	-2.1	Downregulated
acute	mir543	-1.80358	Downregulated
acute	mir329	-1.76	Downregulated
acute	cxcl6	-1.62022	Downregulated
acute	rgd1564571	-1.53323	Downregulated
acute	mgc114246	-1.48348	Downregulated
acute	loc286992	-1.46366	Downregulated
acute	olr1696	-1.43713	Downregulated
acute	mir382	-1.42165	Downregulated
acute	mir369	-1.41	Downregulated
acute	rgd1565058	-1.39589	Downregulated
acute	loc500990	-1.38479	Downregulated
acute	mir667	-1.33	Downregulated
acute	rgd1559532	-1.31852	Downregulated
acute	loc302576	-1.31221	Downregulated
acute	abo3	-1.27814	Downregulated
acute	loc689725	-1.26751	Downregulated
acute	rt1-m2	-1.26479	Downregulated
acute	glyatl1	-1.26052	Downregulated
acute	loc498933	-1.2503	Downregulated
acute	rt1-a3	-1.2477	Downregulated
acute	mir325	-1.24	Downregulated
acute	spink1l	-1.23998	Downregulated
acute	rgd1564319	-1.23098	Downregulated
acute	mir29c	-1.23	Downregulated
acute	clec4m	-1.2166	Downregulated
acute	smim38	-1.21164	Downregulated
acute	rgd1565410	-1.20012	Downregulated
acute	best4	-1.17969	Downregulated
subacute	bnip5	-2.98	Downregulated
subacute	tmem121b	-2.85	Downregulated
subacute	tafa1	-2.68	Downregulated
subacute	or4d1	-2.64	Downregulated
subacute	catspere2	-2.49	Downregulated
subacute	ldc1	-1.96	Downregulated
subacute	d430036j16rik	-1.94	Downregulated
subacute	shisal2b	-1.88	Downregulated
subacute	tafa2	-1.86	Downregulated
subacute	or51e2	-1.84	Downregulated
subacute	sfta3-ps	-1.82	Downregulated
subacute	mup17	-1.78	Downregulated
subacute	nexmif	-1.76	Downregulated
subacute	rtl4	-1.72	Downregulated
subacute	loc689064///hbb-b1	-1.7	Downregulated
subacute	gm10754	-1.681	Downregulated
subacute	cracdl	-1.67	Downregulated
subacute	ccn3	-1.58673	Downregulated
subacute	entrep2	-1.58	Downregulated
subacute	gm10406	-1.58	Downregulated
subacute	lbhd2	-1.57256	Downregulated
subacute	or51a8	-1.57	Downregulated
subacute	trav3-3	-1.565	Downregulated
subacute	b230303a05rik	-1.55158	Downregulated
subacute	mhrt	-1.5405	Downregulated
subacute	gpr52	-1.536	Downregulated
subacute	gm3264	-1.52	Downregulated
subacute	or8k38	-1.51	Downregulated
subacute	or51f23	-1.5	Downregulated
subacute	gm10790	-1.4881	Downregulated
long-term	rgd1559482	-5.7066	Downregulated
long-term	msr1	-5.18944	Downregulated
long-term	cd300c2	-5.14499	Downregulated
long-term	stra6l	-4.00205	Downregulated
long-term	cd300le	-3.97574	Downregulated
long-term	lilrb2	-3.70652	Downregulated
long-term	ckap2l	-3.53276	Downregulated
long-term	pclaf	-3.52215	Downregulated
long-term	h1f5	-3.14588	Downregulated
long-term	calhm6	-3.14498	Downregulated
long-term	aoah	-3.1436	Downregulated
long-term	rexo5	-3.0522	Downregulated
long-term	rt1-db2	-2.93588	Downregulated
long-term	ticam2	-2.70345	Downregulated
long-term	cd84	-2.52246	Downregulated
long-term	pimreg	-2.48664	Downregulated
long-term	loc102553672	-2.4358	Downregulated
long-term	nlrp3	-2.43535	Downregulated
long-term	lrmda	-2.39649	Downregulated
long-term	ugt1a2	-2.33926	Downregulated
long-term	loc102553978	-2.28722	Downregulated
long-term	loc689064///hbb-b1	-2.26	Downregulated
long-term	tmem273	-2.22401	Downregulated
long-term	loc102557492	-2.22318	Downregulated
long-term	c9h6orf141	-2.19645	Downregulated
long-term	tent5c	-2.10232	Downregulated
long-term	tasl	-2.10042	Downregulated
long-term	mastl	-2.07447	Downregulated
long-term	kng1	-2.04123	Downregulated
long-term	rt1-bb	-2.03595	Downregulated
acute	hspa1b	3.38884	Upregulated
acute	hspa1a	3.24	Upregulated
acute	npas4	3.10446	Upregulated
acute	ccl3	2.93092	Upregulated
acute	lilrb4a///lilr4b	2.68959	Upregulated
acute	pald1///thbs1	2.38141	Upregulated
acute	fos	2.30201	Upregulated
acute	cxcl1	2.094	Upregulated
acute	ccl2	2.08238	Upregulated
acute	ccn1	2.00473	Upregulated
acute	ctla2b///ctla2a	1.97493	Upregulated
acute	a130040m12rik	1.96781	Upregulated
acute	fosb	1.92343	Upregulated
acute	snord14e	1.775	Upregulated
acute	atf3	1.74609	Upregulated
acute	a130040m12rik	1.72056	Upregulated
acute	cd14	1.67338	Upregulated
acute	3930401b19rik	1.66604	Upregulated
acute	loc100044068///ifi202b	1.63828	Upregulated
acute	apold1	1.61835	Upregulated
acute	b230214o09rik	1.57603	Upregulated
acute	a130040m12rik	1.55496	Upregulated
acute	ccl4	1.53103	Upregulated
acute	cyr61	1.47603	Upregulated
acute	gadd45g	1.41378	Upregulated
acute	zfp36	1.37922	Upregulated
acute	egr2	1.29178	Upregulated
acute	hspb1	1.29	Upregulated
acute	hmox1	1.2877	Upregulated
acute	gadd45b	1.21532	Upregulated
subacute	lilrb4b	-7.22	Downregulated
subacute	cstdc4	-7.11	Downregulated
subacute	pira12	-6.19	Downregulated
subacute	ifi211	-5.95	Downregulated
subacute	cstdc5	-4.94	Downregulated
subacute	pira2	-4.935	Downregulated
subacute	ifi207	-4.875	Downregulated
subacute	lilrb4a	-4.87	Downregulated
subacute	ifi209	-4.49	Downregulated
subacute	rgd1559482	-4.4486	Downregulated
subacute	spp1	-4.34252	Downregulated
subacute	pira7	-4.33	Downregulated
subacute	gm3776	-4.05	Downregulated
subacute	lilrb4a///lilr4b	-3.92259	Downregulated
subacute	mirt2	-3.4273	Downregulated
subacute	lcn2	-3.40897	Downregulated
subacute	lgals3	-3.37851	Downregulated
subacute	timp1	-3.26356	Downregulated
subacute	hspa1a	-3.03967	Downregulated
subacute	sirpb1b	-2.97855	Downregulated
subacute	gm9733	-2.9735	Downregulated
subacute	hspb1	-2.97156	Downregulated
subacute	ccl2	-2.94708	Downregulated
subacute	hmox1	-2.92296	Downregulated
subacute	pira11	-2.87419	Downregulated
subacute	ptprc///ptprc	-2.82	Downregulated
subacute	ccl12	-2.76286	Downregulated
subacute	ccn1	-2.75	Downregulated
subacute	gm5150	-2.7252	Downregulated
subacute	jaml	-2.72	Downregulated
long-term	ly49i4///ly49s7///klra5///ly49i2	-6.19906	Downregulated
long-term	clec7a	-5.44062	Downregulated
long-term	rgd1561778	-5.2629	Downregulated
long-term	loc100910679	-5.0462	Downregulated
long-term	loc100911545///a2m	-4.63554	Downregulated
long-term	kng1l1///kng2///kng1	-4.63364	Downregulated
long-term	tlr8	-4.6066	Downregulated
long-term	itgax	-4.59114	Downregulated
long-term	cyp2d5///cyp2d1	-4.5711	Downregulated
long-term	evi2b	-4.55916	Downregulated
long-term	loc102553715///mfap4	-4.40692	Downregulated
long-term	loc691173///ckap2	-4.3528	Downregulated
long-term	cenpe	-4.33966	Downregulated
long-term	mki67	-4.27138	Downregulated
long-term	loc686151	-4.19458	Downregulated
long-term	loc100359539///rrm2	-4.17038	Downregulated
long-term	wdfy4	-4.12	Downregulated
long-term	loc100911825	-4.0286	Downregulated
long-term	loc100910669	-3.76666	Downregulated
long-term	ccl6	-3.72159	Downregulated
long-term	igkc	-3.6946	Downregulated
long-term	spp1	-3.67	Downregulated
long-term	depdc1	-3.65378	Downregulated
long-term	gpnmb	-3.62183	Downregulated
long-term	itih2	-3.60034	Downregulated
long-term	card14	-3.52862	Downregulated
long-term	lum	-3.49	Downregulated
long-term	irf8	-3.48909	Downregulated
long-term	loc100911217	-3.48422	Downregulated
long-term	frrs1	-3.47068	Downregulated

## Sheet: Sheet7
Suppl. Table 8: Top30 enriched gene ontology terms for biological process in rats compared to mice acutely after stroke
ID	Description	setSize	enrichmentScore	NES	pvalue	p.adjust
GO:0030855	epithelial cell differentiation	591	0.429999	-1.34374	0.0001	0.0001
GO:0048598	embryonic morphogenesis	555	0.433473	-1.35337	0.0001	0.0001
GO:0048732	gland development	411	0.482489	-1.49763	0.0001	0.0001
GO:0045165	cell fate commitment	242	0.523522	-1.60209	0.0001	0.0001
GO:0019953	sexual reproduction	680	0.409817	-1.28408	0.0003	0.0003
GO:0098660	inorganic ion transmembrane transport	690	0.409201	-1.28247	0.0003	0.0003
GO:0050954	sensory perception of mechanical stimulus	169	0.501745	-1.51079	0.000305	0.000305
GO:0003006	developmental process involved in reproduction	761	0.406563	-1.27581	0.0004	0.0004
GO:0048736	appendage development	160	0.506427	-1.5199	0.000509	0.000509
GO:0060173	limb development	160	0.506427	-1.5199	0.000509	0.000509
GO:0008544	epidermis development	283	0.455084	-1.39998	0.000601	0.000601
GO:0050953	sensory perception of light stimulus	139	0.507269	-1.50851	0.00082	0.00082
GO:0048706	embryonic skeletal system development	112	0.524257	-1.53837	0.001035	0.001035
GO:0006936	muscle contraction	276	0.452288	-1.38966	0.001103	0.001103
GO:0098739	import across plasma membrane	182	0.480667	-1.45411	0.001214	0.001214
GO:0007009	plasma membrane organization	138	0.496958	-1.47718	0.001436	0.001436
GO:0060041	retina development in camera-type eye	145	0.487725	-1.45522	0.001534	0.001534
GO:0061061	muscle structure development	587	0.39911	-1.24715	0.0027	0.0027
GO:0060485	mesenchyme development	266	0.444042	-1.36302	0.00281	0.00281
GO:0022600	digestive system process	107	0.505476	-1.47825	0.003213	0.003213
GO:0042692	muscle cell differentiation	363	0.420429	-1.30224	0.004003	0.004003
GO:0050678	regulation of epithelial cell proliferation	372	0.417276	-1.29275	0.004103	0.004103
GO:0045766	positive regulation of angiogenesis	158	0.469052	-1.4064	0.004179	0.004179
GO:1904018	positive regulation of vasculature development	158	0.469052	-1.4064	0.004179	0.004179
GO:0010876	lipid localization	397	0.416006	-1.29035	0.004404	0.004404
GO:0008202	steroid metabolic process	279	0.433385	-1.33234	0.004612	0.004612
GO:0030324	lung development	196	0.451858	-1.37124	0.004849	0.004849
GO:0007043	cell-cell junction assembly	126	0.482894	-1.42808	0.004938	0.004938
GO:0007586	digestion	122	0.48582	-1.43344	0.00495	0.00495
GO:0045321	leukocyte activation	773	0.383952	-1.20493	0.005	0.005

## Sheet: Sheet8
Suppl. Table 9: Top30 enriched gene ontology terms for biological process in rats compared to mice subacutely after stroke
ID	Description	setSize	enrichmentScore	NES	pvalue	p.adjust
GO:0002684	positive regulation of immune system process	795	-0.360077	1.43974	0.00010268	0.00010268
GO:0046649	lymphocyte activation	716	-0.370987	1.47746	0.00010349	0.00010349
GO:0050776	regulation of immune response	709	-0.377369	1.50222	0.00010356	0.00010356
GO:1903047	mitotic cell cycle process	706	-0.472481	1.88096	0.00010357	0.00010357
GO:0010564	regulation of cell cycle process	663	-0.413769	1.64214	0.0001041	0.0001041
GO:0051301	cell division	604	-0.432095	1.70878	0.0001047	0.0001047
GO:0002694	regulation of leukocyte activation	554	-0.37786	1.48825	0.00010546	0.00010546
GO:0006281	DNA repair	523	-0.400887	1.57519	0.00010594	0.00010594
GO:0044770	cell cycle phase transition	511	-0.460461	1.80647	0.00010632	0.00010632
GO:0042110	T cell activation	501	-0.3792	1.48603	0.00010659	0.00010659
GO:0048285	organelle fission	474	-0.460312	1.79769	0.00010749	0.00010749
GO:0051276	chromosome organization	476	-0.48475	1.89308	0.00010754	0.00010754
GO:0007346	regulation of mitotic cell cycle	476	-0.442905	1.72966	0.00010754	0.00010754
GO:0051249	regulation of lymphocyte activation	448	-0.386996	1.50737	0.00010805	0.00010805
GO:0000280	nuclear division	424	-0.481803	1.87215	0.0001085	0.0001085
GO:0044772	mitotic cell cycle phase transition	429	-0.469876	1.82636	0.00010854	0.00010854
GO:1901987	regulation of cell cycle phase transition	404	-0.475944	1.84362	0.0001094	0.0001094
GO:0010639	negative regulation of organelle organization	358	-0.402931	1.54877	0.00011112	0.00011112
GO:0045786	negative regulation of cell cycle	353	-0.438106	1.68261	0.00011116	0.00011116
GO:0007059	chromosome segregation	333	-0.519752	1.98818	0.00011174	0.00011174
GO:1901990	regulation of mitotic cell cycle phase transition	323	-0.483843	1.84716	0.00011196	0.00011196
GO:0140014	mitotic nuclear division	289	-0.484617	1.83475	0.00011337	0.00011337
GO:0006310	DNA recombination	286	-0.424012	1.60411	0.0001137	0.0001137
GO:0098813	nuclear chromosome segregation	273	-0.528825	1.99457	0.00011401	0.00011401
GO:0010948	negative regulation of cell cycle process	279	-0.485188	1.83085	0.00011419	0.00011419
GO:0006302	double-strand break repair	270	-0.434014	1.63494	0.00011439	0.00011439
GO:0006260	DNA replication	262	-0.448001	1.68236	0.00011494	0.00011494
GO:0090068	positive regulation of cell cycle process	242	-0.453883	1.69559	0.00011606	0.00011606
GO:0051321	meiotic cell cycle	241	-0.463095	1.72918	0.00011623	0.00011623
GO:1901988	negative regulation of cell cycle phase transition	238	-0.508343	1.896	0.00011641	0.00011641

## Sheet: Sheet9
Suppl. Table 10: Top30 enriched gene ontology terms for biological process in rats compared to mice long-term after stroke
ID	Description	setSize	enrichmentScore	NES	pvalue	p.adjust
GO:0099536	synaptic signaling	697	0.42986	-1.99336	0.00015181	0.00015181
GO:0007610	behavior	650	0.358753	-1.65505	0.00015323	0.00015323
GO:0043269	regulation of ion transport	640	0.333568	-1.53733	0.00015326	0.00015326
GO:0007186	G protein-coupled receptor signaling pathway	529	0.37883	-1.71918	0.00015593	0.00015593
GO:0099177	regulation of trans-synaptic signaling	485	0.44457	-2.00159	0.00015669	0.00015669
GO:0050804	modulation of chemical synaptic transmission	484	0.444657	-2.00152	0.00015669	0.00015669
GO:0050808	synapse organization	469	0.352466	-1.58196	0.00015798	0.00015798
GO:0006887	exocytosis	346	0.3946	-1.72205	0.00016197	0.00016197
GO:0050890	cognition	325	0.388615	-1.68642	0.00016236	0.00016236
GO:0099003	vesicle-mediated transport in synapse	246	0.384594	-1.6225	0.00016628	0.00016628
GO:0016079	synaptic vesicle exocytosis	129	0.45824	-1.77776	0.00017232	0.00017232
GO:0002761	regulation of myeloid leukocyte differentiation	106	-0.446792	1.74347	0.00023408	0.00023408
GO:0034446	substrate adhesion-dependent cell spreading	104	-0.470404	1.82943	0.00023419	0.00023419
GO:0030183	B cell differentiation	113	-0.478191	1.88696	0.0002354	0.0002354
GO:0043534	blood vessel endothelial cell migration	112	-0.469042	1.84639	0.00023568	0.00023568
GO:0072089	stem cell proliferation	114	-0.441393	1.74285	0.00023697	0.00023697
GO:0051304	chromosome separation	114	-0.437878	1.72897	0.00023697	0.00023697
GO:0050817	coagulation	132	-0.468613	1.8926	0.00023958	0.00023958
GO:0007599	hemostasis	132	-0.45348	1.83149	0.00023958	0.00023958
GO:0002262	myeloid cell homeostasis	161	-0.455953	1.8987	0.00024266	0.00024266
GO:0042113	B cell activation	211	-0.412696	1.77817	0.00024426	0.00024426
GO:0022409	positive regulation of cell-cell adhesion	230	-0.383594	1.66714	0.00024814	0.00024814
GO:0060326	cell chemotaxis	226	-0.368375	1.59803	0.00024839	0.00024839
GO:0003007	heart morphogenesis	234	-0.357673	1.55794	0.00024876	0.00024876
GO:0051251	positive regulation of lymphocyte activation	236	-0.363352	1.58412	0.00024913	0.00024913
GO:1901342	regulation of vasculature development	253	-0.368141	1.61991	0.000251	0.000251
GO:0070661	leukocyte proliferation	260	-0.357556	1.57769	0.00025132	0.00025132
GO:0002764	immune response-regulating signaling pathway	276	-0.384999	1.70905	0.00025151	0.00025151
GO:0090132	epithelium migration	285	-0.382096	1.70173	0.00025374	0.00025374
GO:0042060	wound healing	301	-0.360507	1.61515	0.0002551	0.0002551

[truncated: 7 more sheets: Sheet10, Sheet11, Sheet12, Sheet13, Sheet14, Sheet15, Sheet16]
